# Supplementary material for: Reasons for enhanced activity of doxorubicin on co-delivery with octa(3-aminopropyl)silsesquioxane
Source: Royal Society of Chemistry journal article supplement (doi:10.1039/d0ra01319f), 2020-01-01
Supplement: d0ra01319f1.pdf [file d0ra01319f1.pdf]

## *Supporting information*

### **Reasons for enhanced activity of doxorubicin on co-delivery with octa(3-aminopropyl)silsesquioxane**

Kinga Piorecka,<sup>\*a</sup> Jan Kurjata,<sup>a</sup> Irena Bak-Sypien,<sup>a</sup> Marek Cypryk,<sup>a</sup> Urszula Steinke<sup>a</sup> and Włodzimierz A. Stanczyk<sup>a</sup>

<sup>a</sup> Centre of Molecular and Macromolecular Studies, Polish Academy of Sciences, Sienkiewicza 112, 90-363 Łódź, Poland

\* Correspondence: kgradzin@cbmm.lodz.pl

#### **Table of Content**

Figure 1. FTIR spectra of DOX-POSS and DOX.

Figure 2. ESI MS spectrum of POSS after 24h incubation (37°C) in H<sub>2</sub>O.

Figure 3. ESI MS spectrum of doxorubicin after 24h incubation (37°C) in H<sub>2</sub>O.

Figure 4. ESI MS experimental spectrum of DOX-POSS complex ([6DOX-POSS+3H<sup>+</sup>-2Cl]<sup>3+</sup>) and simulated isotopic patterns.

Table 1. Experimental and theoretical masses of DOX:POSS complexes

Structure 1. Doxorubicin with labelled carbon atoms

Figure 5. Three possibilities of complex formation of two molecules of 1.

Figure 6. Cage and ladder-like tetramers of hydroxy amine hydrochloride optimized by PM3 method.

Figure 7. Ladder tetramer of doxorubicin hydrochloride (PM3 optimized).

Figure 8. B3LYP-GD3/6-31+G(d) optimized doxorubicin  $\pi$ -stacking dimer structures: (A) parallel, (B) antiparallel.

Figure 9. Doxorubicin hydrochloride, the most stable conformer (by ca 0.7 kcal/mol more stable than the second stable one) optimized with B3LYP/6-31+G(d). The hydrogen bonds are marked with dashed lines.

Figure 10. Conformation of the doxorubicin hydrochloride dimer linked through an NH<sup>3+</sup>Cl<sup>-</sup> bridge and additionally bound by intramolecular parallel  $\pi$ - $\pi$  stacking

Figure 11. Conformation of the doxorubicin hydrochloride dimer bound by antiparallel  $\pi$ - $\pi$  stacking.

Figure 12. PM7 optimized structure of doxorubicine hydrochloride tetramer.

Figure 13. Z-potential of DOX:POSS (8:1) and POSS at 0h and 24h in PBS at 37°C.

Figure 14. Fluorescence emission spectra of complex DOX:POSS (8:1) in PBS with time at 37°C.

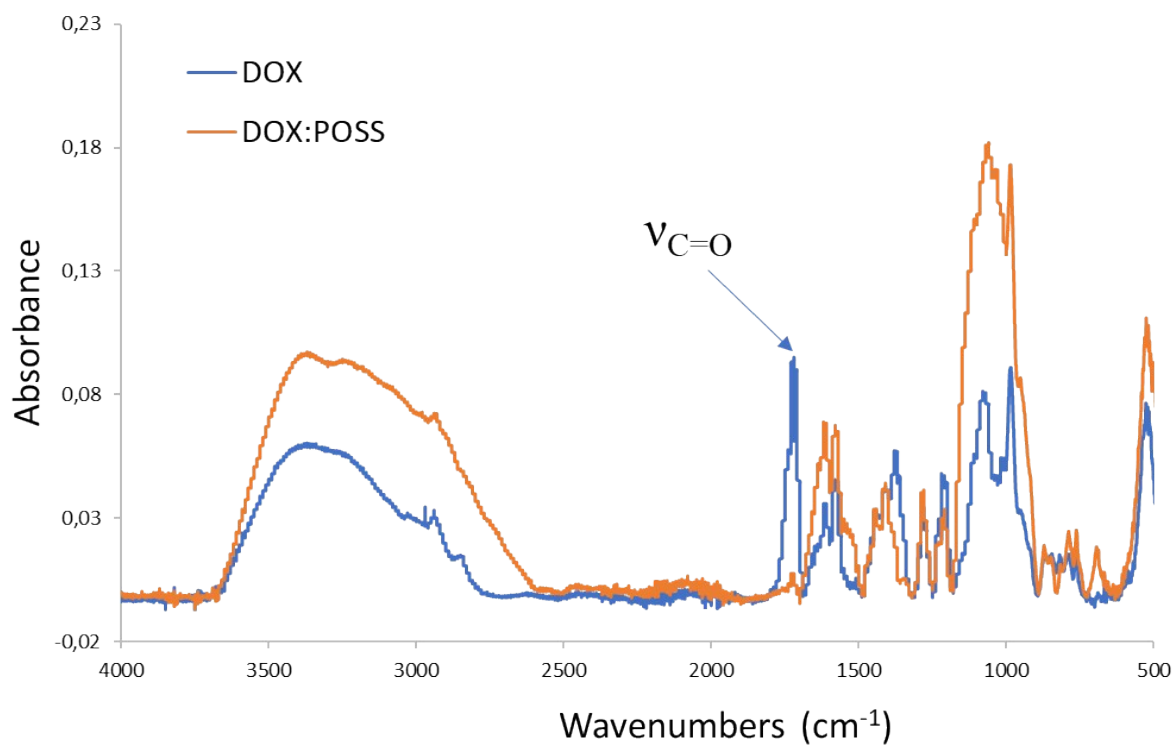

Fig. 1. FTIR spectra of DOX-POSS and DOX.

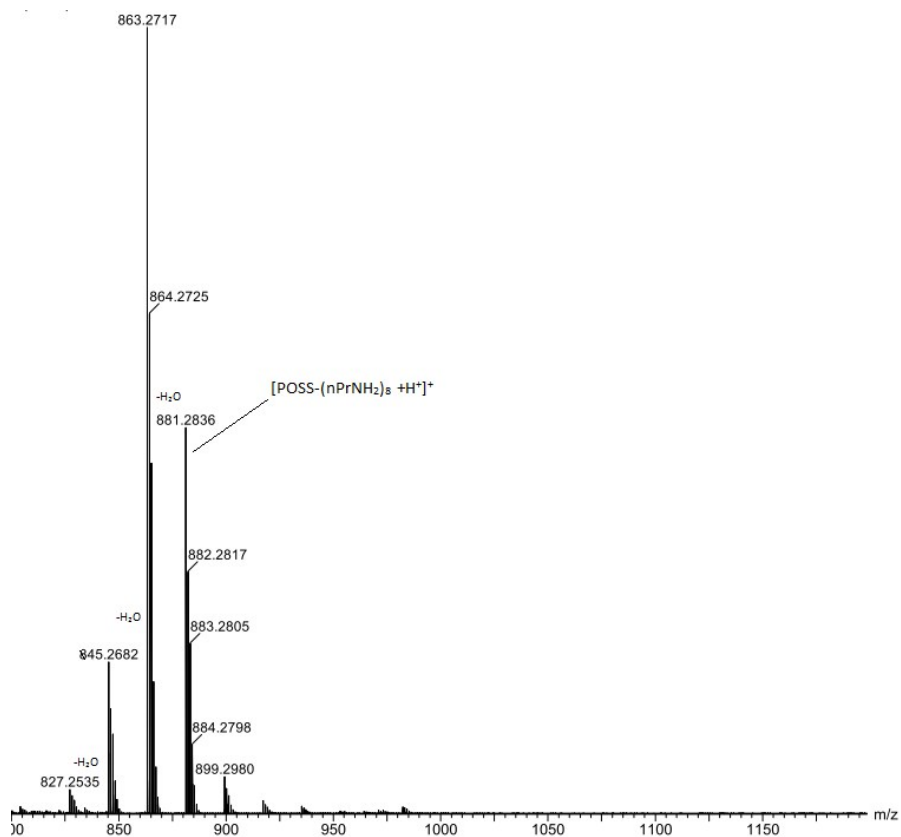

Fig. 2. ESI MS spectrum of POSS after 24h incubation (37°C) in H<sub>2</sub>O.

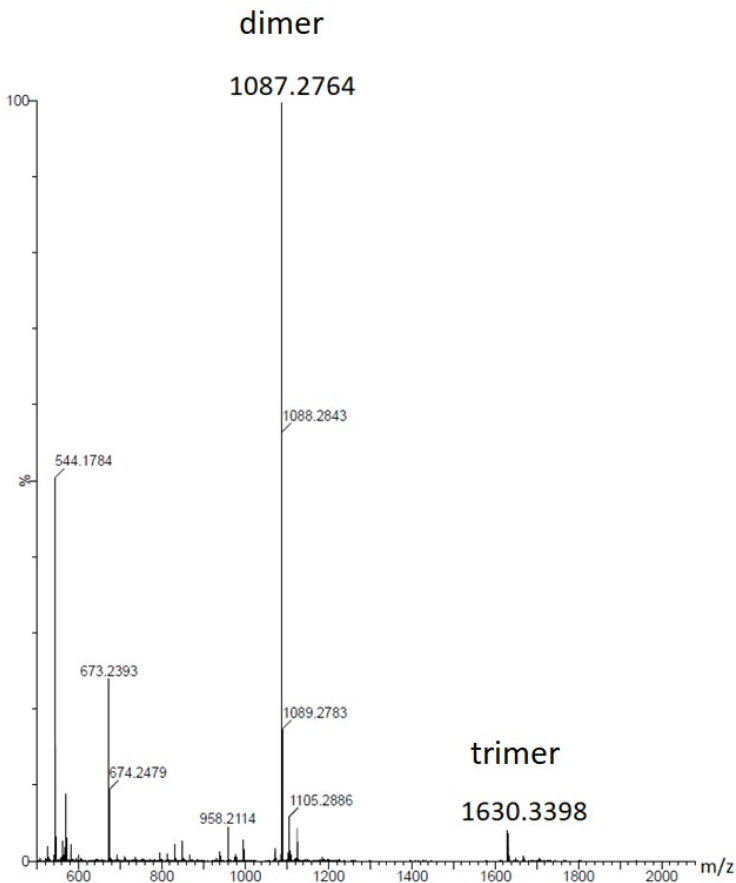

Fig. 3. ESI MS spectrum of doxorubicin after 24h incubation (37°C) in H<sub>2</sub>O.

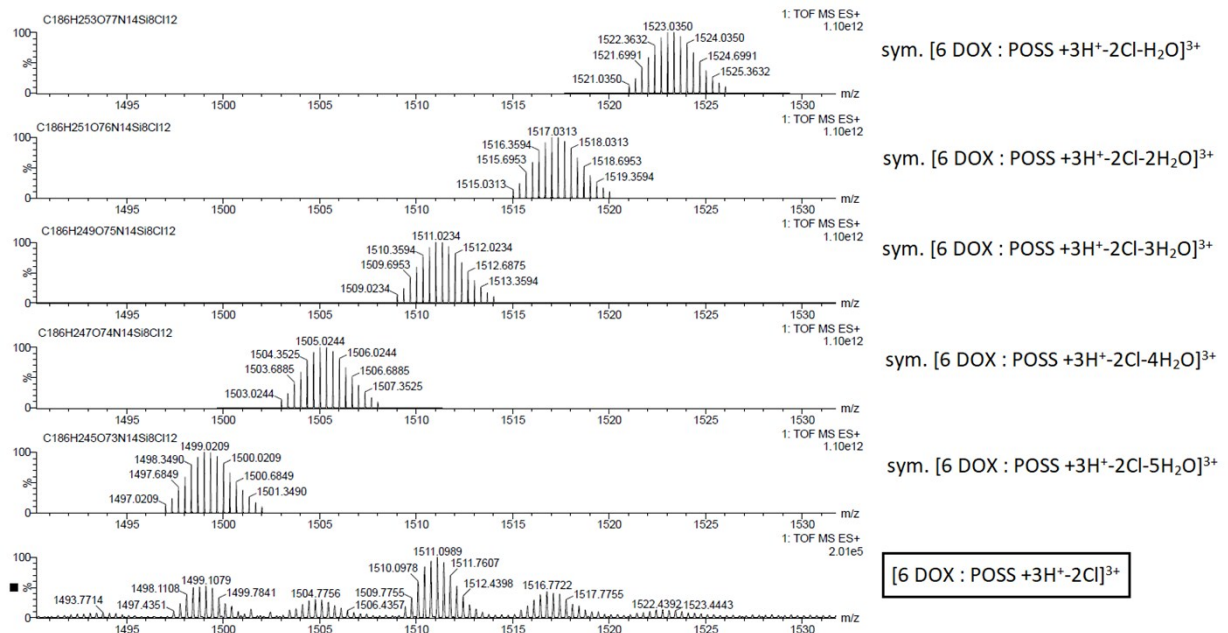

Fig. 4. ESI MS experimental spectrum of DOX-POSS complex ( $[6\text{DOX-POSS}+3\text{H}^+-2\text{Cl}]^{3+}$ ) and simulated isotopic patterns.

Table 1. Experimental and theoretical masses of DOX:POSS complexes

|                    |                                                                              |                        |                   |
|--------------------|------------------------------------------------------------------------------|------------------------|-------------------|
| <b>6 DOX:POSS</b>  | <b>[6 DOX·HCl+POSS(HCl)<sub>8</sub>-2HCl-3H<sub>2</sub>O+H<sup>+</sup>]</b>  | <b>cal. 4527.11 Da</b> | <b>4527.29 Da</b> |
| <b>7 DOX:POSS</b>  | <b>[7 DOX·HCl+POSS(HCl)<sub>8</sub>-2HCl-3H<sub>2</sub>O+H<sup>+</sup>]</b>  | cal. 5106.08 Da        | 5106.45 Da        |
| <b>8 DOX:POSS</b>  | <b>[8 DOX·HCl+POSS(HCl)<sub>8</sub>-2HCl-3H<sub>2</sub>O+H<sup>+</sup>]</b>  | cal.5687.07 Da         | 5688.59 Da        |
| <b>9 DOX:POSS</b>  | <b>[9 DOX·HCl+POSS(HCl)<sub>8</sub>-2HCl-3H<sub>2</sub>O+H<sup>+</sup>]</b>  | cal. 6267.05 Da        | 6266.74 Da        |
| <b>10 DOX:POSS</b> | <b>[10 DOX·HCl+POSS(HCl)<sub>8</sub>-2HCl-3H<sub>2</sub>O+H<sup>+</sup>]</b> | cal. 6847.03 Da        | 6847.85 Da        |
| <b>11 DOX:POSS</b> | <b>[11DOX·HCl+POSS(HCl)<sub>8</sub>-2HCl-3H<sub>2</sub>O+H<sup>+</sup>]</b>  | cal. 7426.01 Da        | 7426.05 Da        |

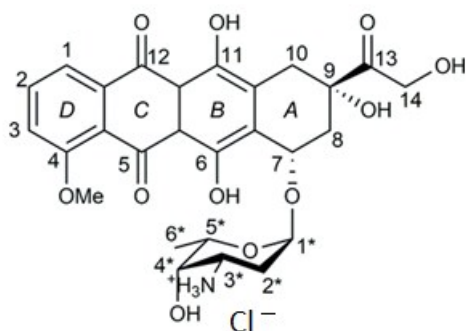

Structure 1. Doxorubicin with labelled carbon atoms

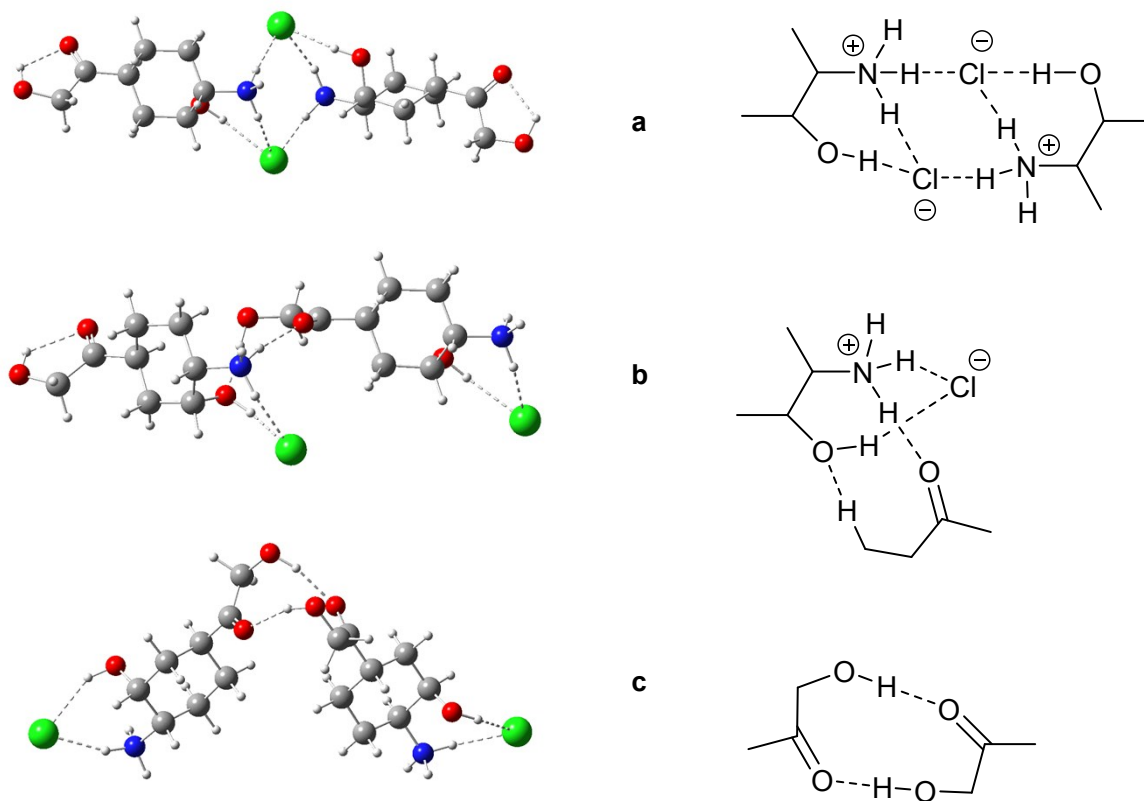

Fig. 5. Three possibilities of complex formation of two molecules of 1.

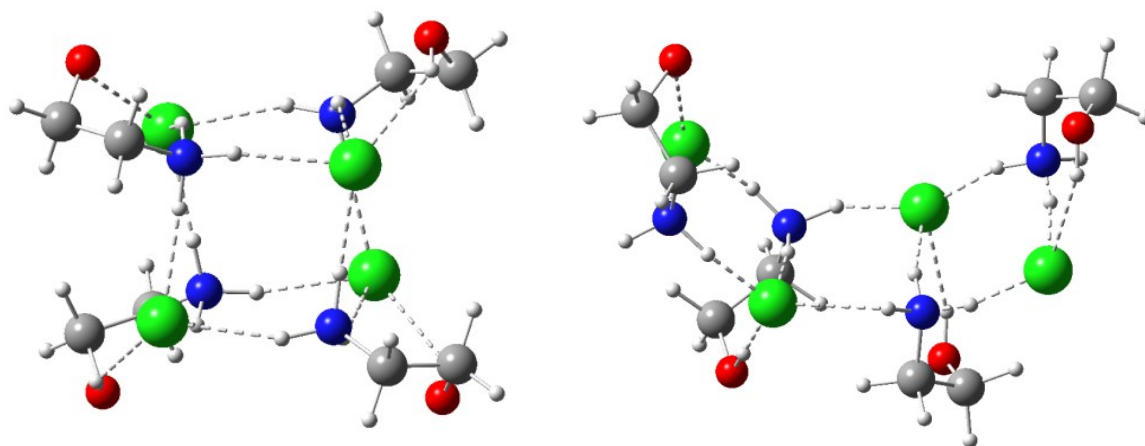

Fig. 6. Cage and ladder-like tetramers of hydroxy amine hydrochloride optimized by PM3 method.

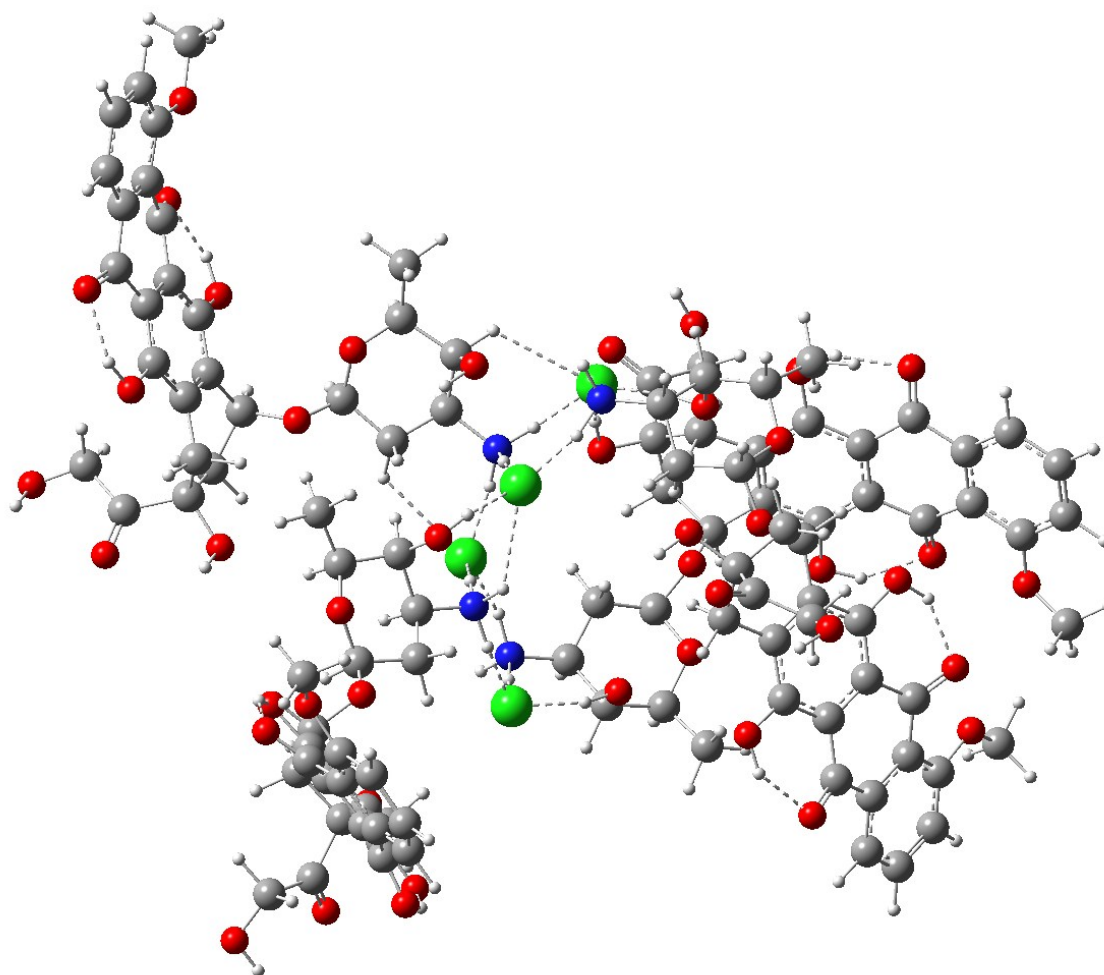

Fig. 7. Ladder tetramer of doxorubicin hydrochloride (PM3 optimized).

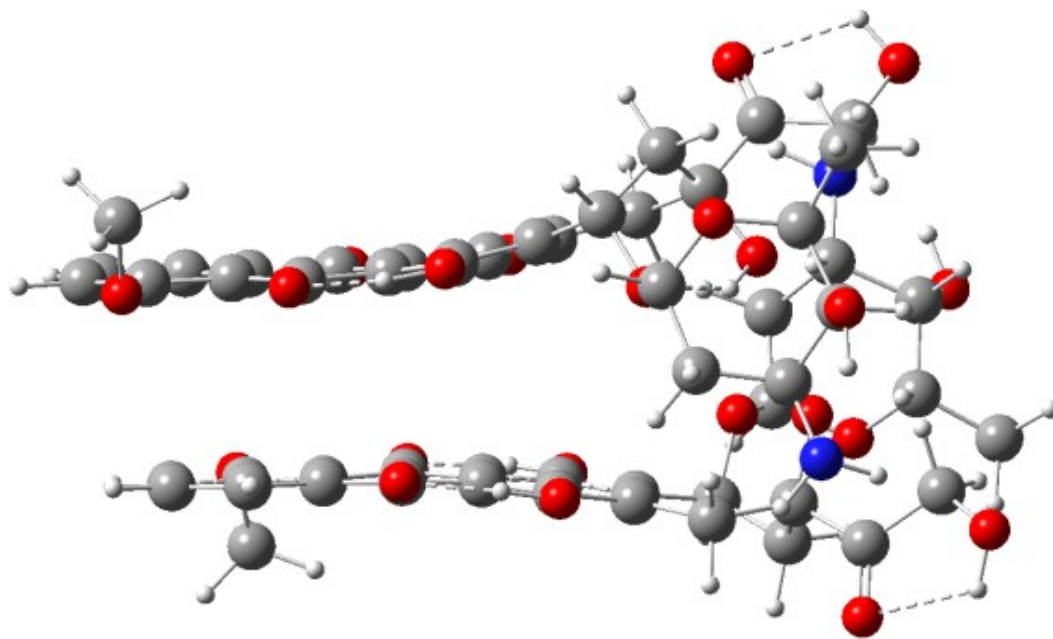

**A**

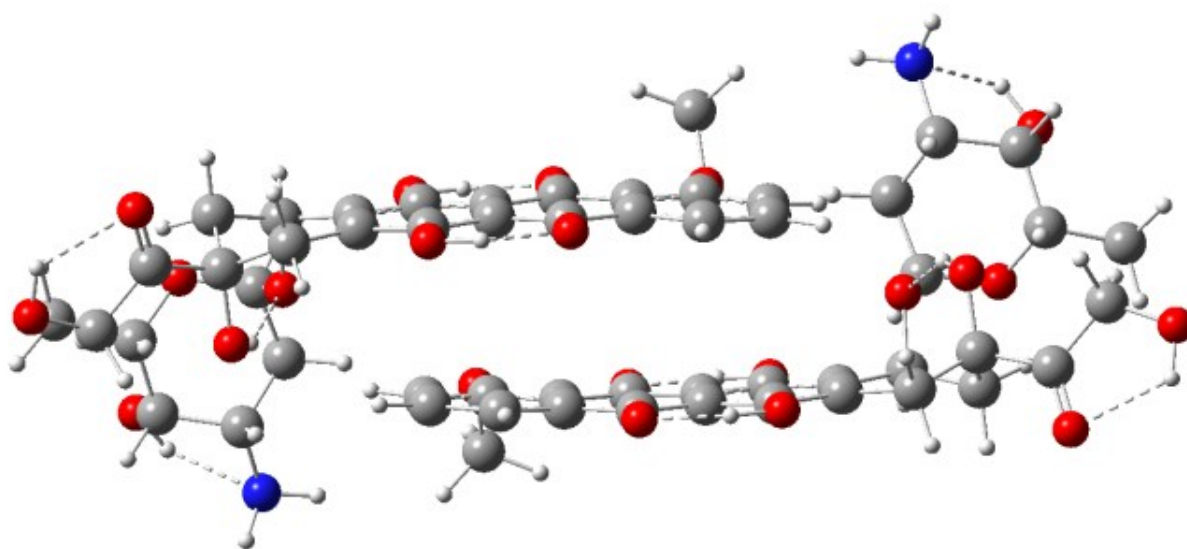

**B**

Fig. 8. B3LYP-GD3/6-31+G(d) optimized doxorubicin  $\pi$ -stacking dimer structures: (A) parallel, (B) antiparallel.

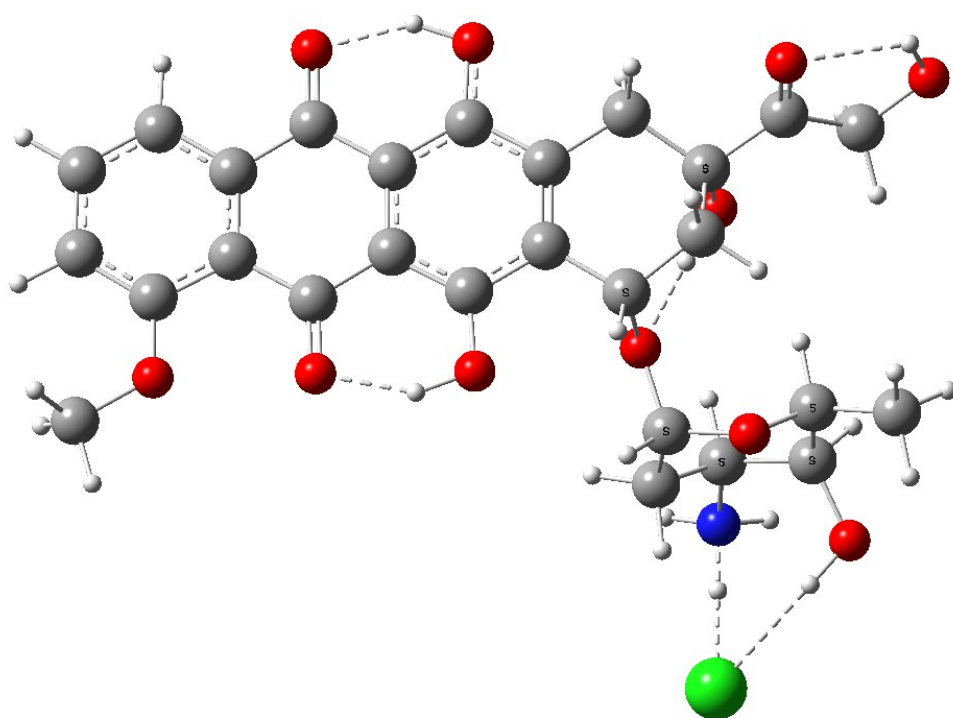

Fig. 9. Doxorubicin hydrochloride, the most stable conformer (by ca 0.7 kcal/mol more stable than the second stable one) optimized with B3LYP/6-31+G(d). The hydrogen bonds are marked with dashed lines.

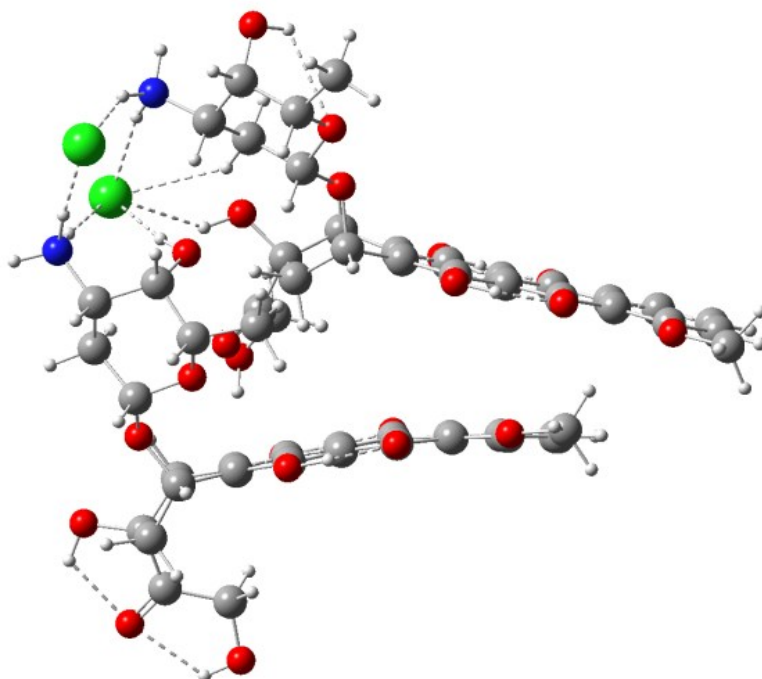

Fig. 10. Conformation of the doxorubicin hydrochloride dimer linked through an  $\text{NH}_3^+\text{Cl}^-$  bridge and additionally bound by intramolecular parallel  $\pi$ - $\pi$  stacking

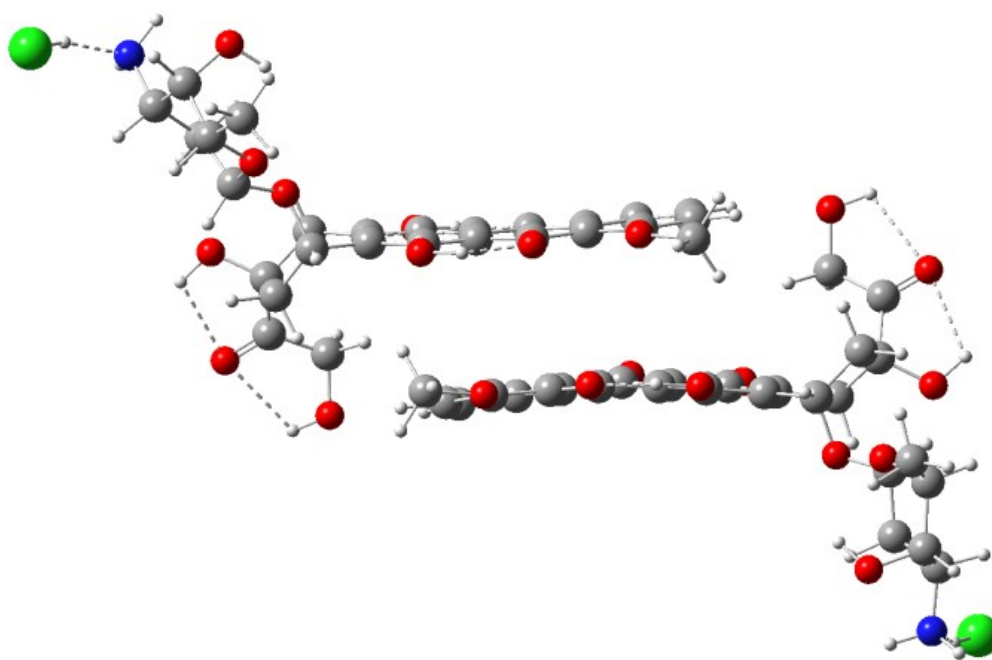

Fig. 11. Conformation of the doxorubicin hydrochloride dimer bound by antiparallel  $\pi$ - $\pi$  stacking.

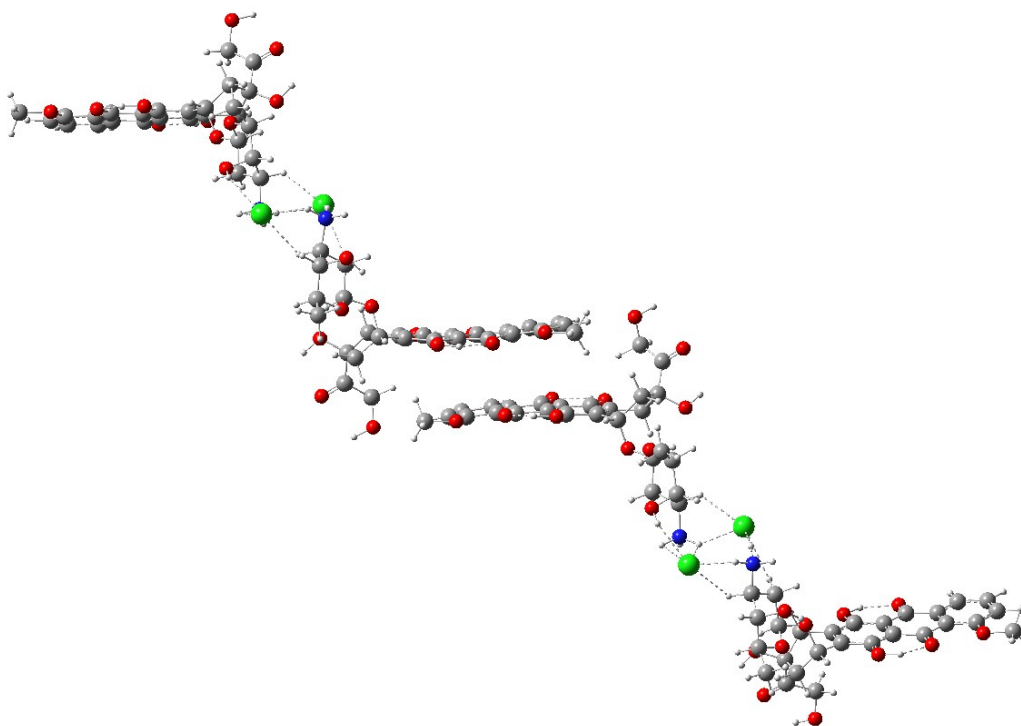

Fig. 12. PM7 optimized structure of doxorubicin hydrochloride tetramer.



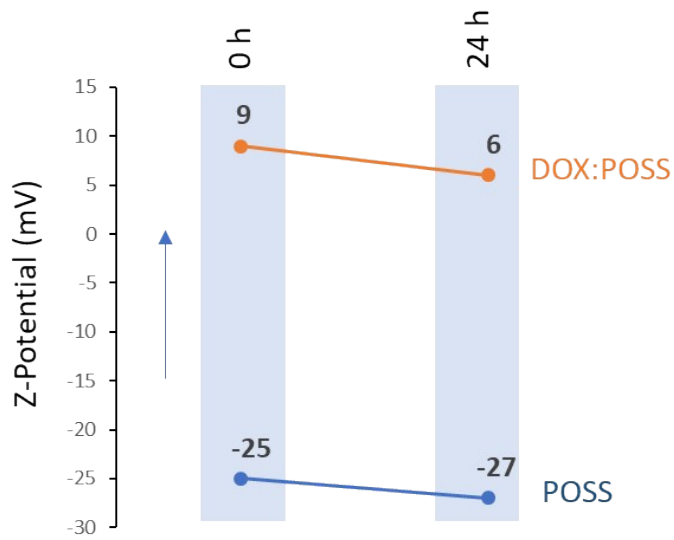

Fig. 13. Z-potential of DOX:POSS (8:1) and POSS at 0h and 24h in PBS at 37°C.

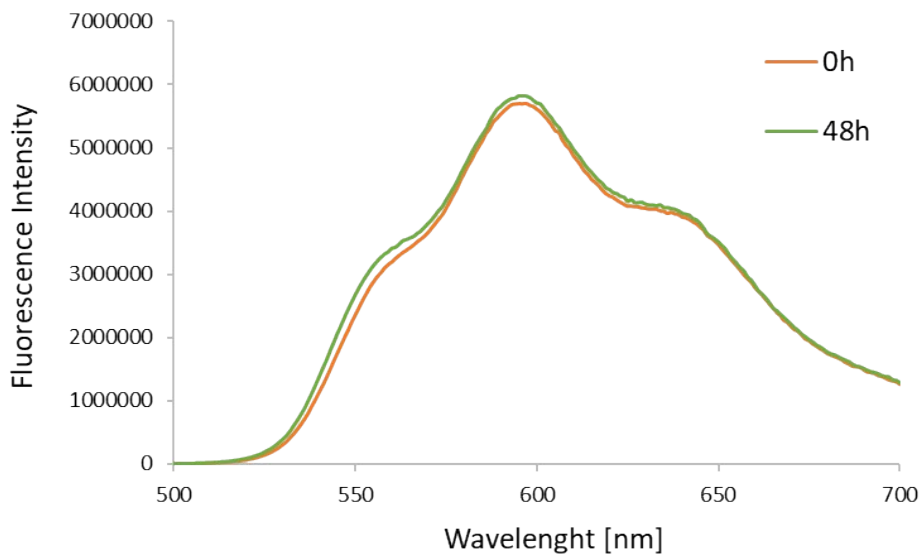

Fig. 14. Fluorescence emission spectra of complex DOX:POSS (8:1) in PBS with time at 37°C.
